# Supplementary material for: Solid-State NMR Studies of the Succinate-Acetate Permease from Citrobacter Koseri in Liposomes and Native Nanodiscs
Source: MDPI journal article supplement (doi:10.3390/life11090908), 2021-08-31
Supplement: s1 [file s1]

# Supplementary Material

## Solid-state NMR studies of the Succinate-acetate Permease from *Citrobacter Koseri* in Liposomes and Native Nanodiscs

Xing-qi Dong<sup>1,2,3</sup>, Jing-yu Lin<sup>1,2,3</sup>, Peng-fei Wang<sup>1,2,3</sup>, Yi Li<sup>1,2,3</sup>, Jian Wang<sup>1</sup>, Bing Li<sup>1</sup>, Jun Liao<sup>1</sup>, Jun-xia Lu<sup>1,\*</sup>

- <sup>1</sup> School of Life Science and Technology, ShanghaiTech University, Shanghai 201210, P. R. China; dongxq@shanghaitech.edu.cn, linjy@shanghaitech.edu.cn, wangpf@shanghaitech.edu.cn, liyi@shanghaitech.edu.cn, wangjian1@shanghaitech.edu.cn, libing@shanghaitech.edu.cn, liaojun@shanghaitech.edu.cn  
<sup>2</sup> State Key Laboratory of Molecular Biology, CAS Center for Excellence in Molecular Cell Science, Shanghai Institute of Biochemistry and Cell Biology, Chinese Academy of Sciences, Shanghai 200031, P. R. China  
<sup>3</sup> University of Chinese Academy of Sciences, Beijing 100049, P. R. China  
 \* Correspondence: lujx@shanghaitech.edu.cn;

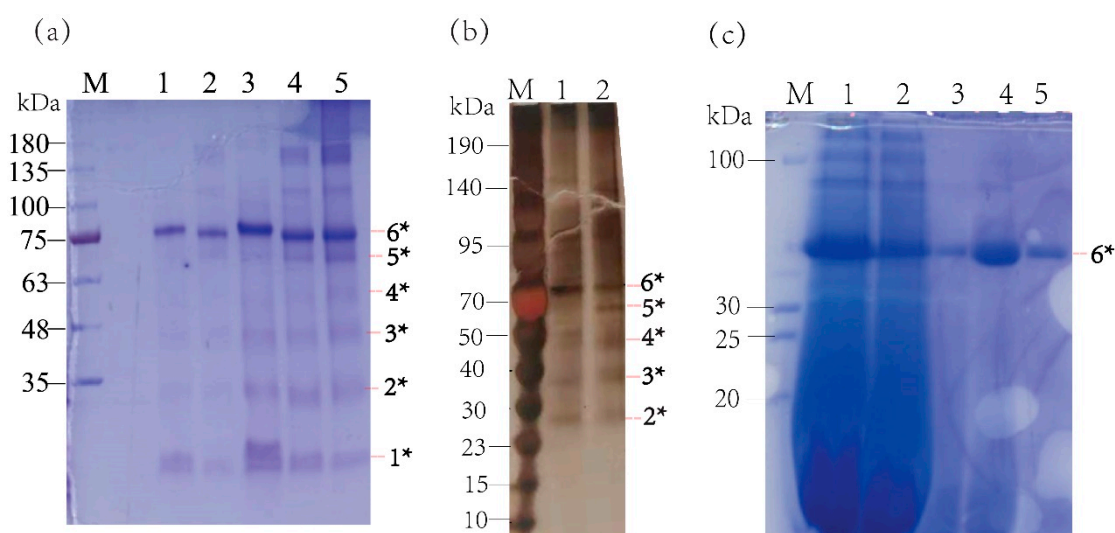

**Figure S1.** (a) SDS-PAGE gel in the coomassie brilliant blue stain showed SatP in different oligomeric state in DM. The protein was crosslinked using glutaraldehyde. lane 1–5 are the same as figure 1(c) described. (b) SDS-PAGE gel in silver stain showed the oligomeric states of SatP in liposomes, where lane 1 was the control sample of SatP liposome without crosslinking, lane 2 was the crosslinking product using BS3 (bis[sulfosuccinimidyl] suberate) (Thermo). (c) SDS-PAGE gel in the coomassie brilliant blue stain showed the results of native nanodisc preparation. The protein extraction using SMA, lane 1; lane 2–5 are the same as figure 1(b) described. n\* indicates different oligomeric state of SatP.

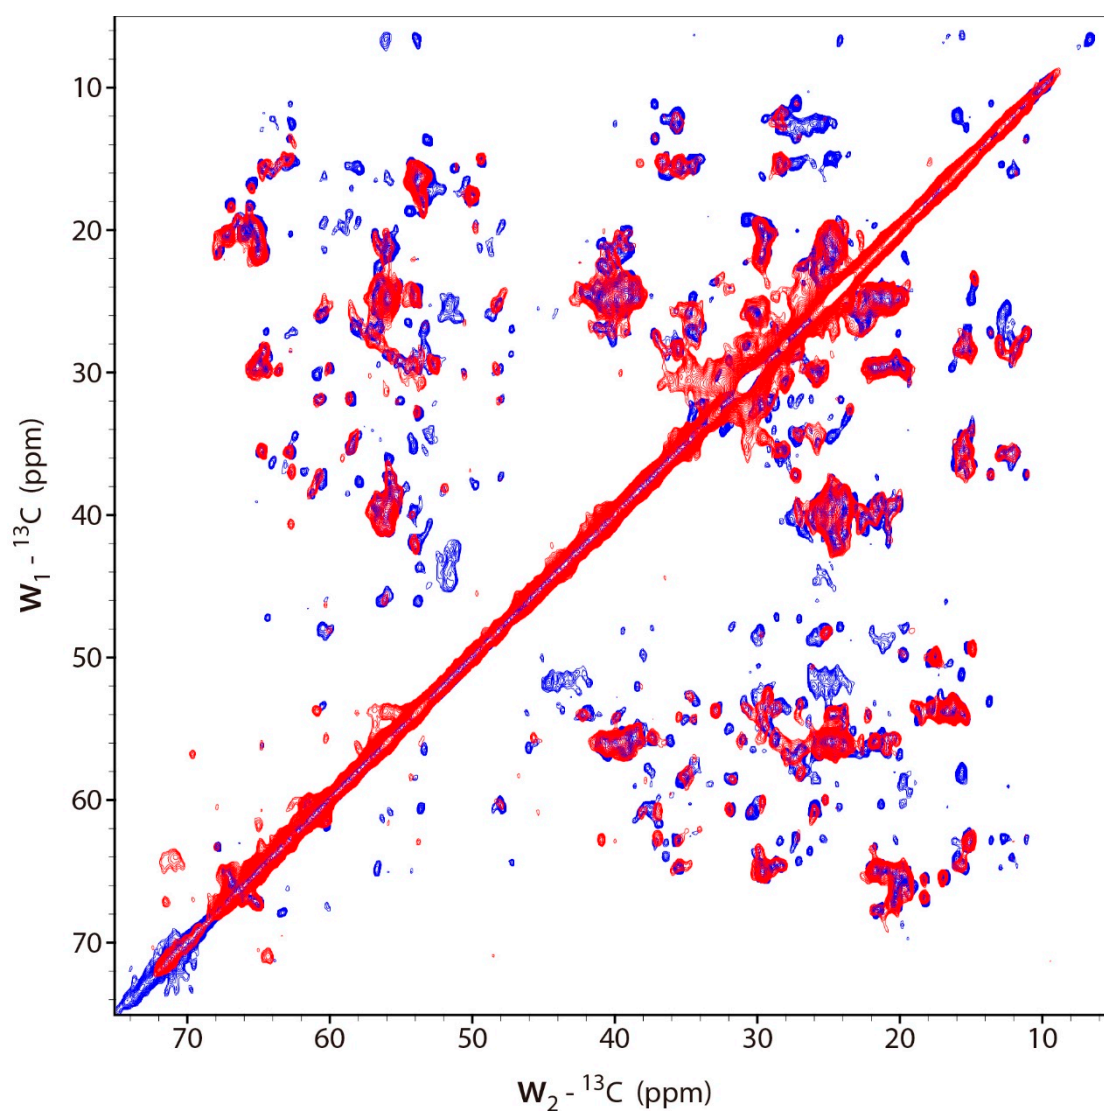

**Figure S2.**  $^{13}\text{C}$ - $^{13}\text{C}$  2D spectra of SatP in liposomes (protein/lipid mole ratio = 1/28) (blue) and in native nanodiscs (red). The maximum  $t_1$  in the indirect dimension was 8 ms and 7.2 ms, respectively. Squared sine function was used for both spectra, with SSB = 4 for the liposome sample and SSB = 2.5 for the native nanodiscs. The total experiment time was about 27 h for the liposome sample and 24 h for the native nanodisc.

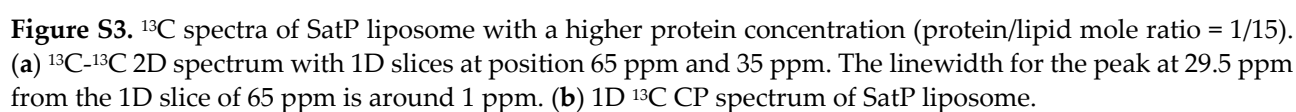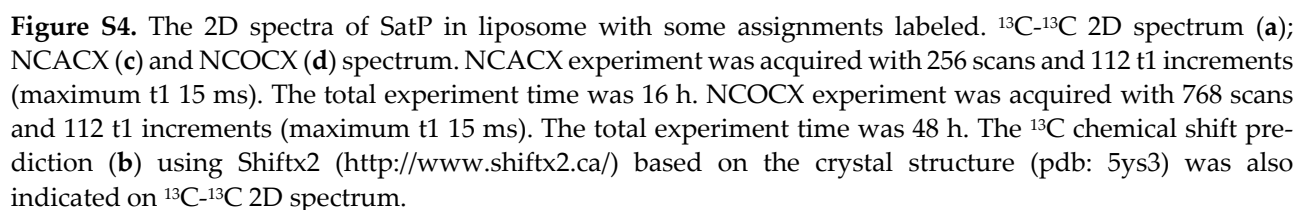

**Table S1.** The chemical shift assignments of SatP in liposomes based only on 2D NMR correlation spectra.

|    | Experiment Results |                 |                          |                         | Shiftx2 Predication      |                         | Secondary Chemical Shift | 2 <sup>nd</sup> Structure |
|----|--------------------|-----------------|--------------------------|-------------------------|--------------------------|-------------------------|--------------------------|---------------------------|
|    | aa                 | <sup>15</sup> N | <sup>13</sup> C $\alpha$ | <sup>13</sup> C $\beta$ | <sup>13</sup> C $\alpha$ | <sup>13</sup> C $\beta$ |                          |                           |
| 1  | L12                |                 | 56.0                     | 40.5                    | 56.8                     | 39.9                    | 2.7                      | Helix 1                   |
| 2  | G13                | 103.5           | 46.0                     |                         | 45.9                     |                         |                          |                           |
| 3  | F17                |                 | 60.5                     | 37.6                    | 60.1                     | 37.5                    | 3.9                      |                           |
| 4  | G18                | 110.3           | 46.2                     |                         | 46.0                     |                         |                          |                           |
| 5  | A29                |                 | 51.2                     | 15.7                    | 50.6                     | 16.9                    | 2.5                      |                           |
| 6  | G30                | 102.5           | 42.1                     |                         | 43.7                     |                         |                          |                           |
| 7  | Y45                |                 | 60.2                     | 37.5                    | 58.2                     | 37.9                    | 3.1                      | Helix 2                   |
| 8  | G46                | 105             | 44.4                     |                         | 45.5                     |                         |                          |                           |
| 9  | G47                | 106.7           | 43.2                     |                         | 44.1                     |                         |                          |                           |
| 10 | I48                | 124.7           | 64.7                     | 35.5                    | 63.4                     | 36.6                    | 5.9                      |                           |
| 11 | A49                | 117.8           | 54.2                     | 15.4                    | 53.8                     | 16.7                    | 5.8                      |                           |
| 12 | F52                | 120.7           | 58.5                     | 35.2                    | 58.6                     | 36.8                    | 4.3                      |                           |
| 13 | A53                | 120.9           | 53.0                     | 16.3                    | 53.5                     | 16.4                    | 3.7                      | Helix 3                   |
| 14 | G54                | 104.7           | 45.8                     |                         | 46.1                     |                         |                          |                           |
| 15 | Y72                |                 | 58.6                     | 34.7                    | 58.3                     | 35.3                    | 4.3                      |                           |
| 16 | G73                | 109.6           | 45.2                     |                         | 45.8                     |                         |                          |                           |
| 17 | L99                |                 | 56.1                     | 39.8                    | 56.5                     | 39.9                    | 3.5                      | Helix 4                   |
| 18 | G100               | 107.3           | 46.1                     |                         | 46.1                     |                         |                          |                           |
| 19 | A101               | 123.9           | 53.8                     | 16.6                    | 53.9                     | 16.7                    | 4.2                      |                           |
| 20 | Y102               | 118.4           | 59.8                     | 36                      | 59.8                     | 36.1                    | 4.2                      |                           |
| 21 | L103               | 119.1           | 55.8                     | 39.6                    | 56.6                     | 40.0                    | 3.4                      |                           |
| 22 | G104               | 109.6           | 45.2                     |                         | 45.9                     |                         |                          |                           |
| 23 | A139               |                 | 53.3                     | 16.3                    | 53.8                     | 16.9                    | 4.0                      | Helix 5                   |
| 24 | F140               | 118.2           | 61.8                     | 37.1                    | 59.7                     | 37.7                    | 5.7                      |                           |
| 25 | G141               | 107.3           | 45.7                     |                         | 46.2                     |                         |                          |                           |
| 26 | N142               | 116.5           | 53.9                     | 37.5                    | 54.1                     | 37.3                    | 1.8                      |                           |
| 27 | I143               | 120.3           | 62.7                     | 35.6                    | 63.2                     | 36.9                    | 3.8                      |                           |
| 28 | A144               | 120.5           | 50.2                     | 17.8                    | 50.0                     | 17.5                    | -0.6                     |                           |
| 29 | G145               | 110             | 43.9                     |                         | 44.8                     |                         |                          | Helix 6                   |
| 30 | A153               |                 | 53.7                     | 15.7                    | 53.8                     | 16.6                    | 5.0                      |                           |
| 31 | G154               | 102             | 47.3                     |                         | 45.9                     |                         |                          |                           |
| 32 | W155               |                 |                          | 26.9                    | 59.5                     | 27.5                    |                          |                           |
| 33 | I156               | 116.2           | 62.9                     | 37.2                    | 62.9                     | 35.7                    | 2.4                      |                           |
| 34 | G157               | 110.5           | 45.5                     |                         | 46.1                     |                         |                          |                           |
| 35 | L158               | 123.5           | 56.1                     | 39.1                    | 56.5                     | 39.9                    | 4.2                      |                           |
| 36 | V159               | 119.2           | 65.2                     | 29.5                    | 65.1                     | 30.1                    | 5.2                      |                           |
| 37 | C160               | 118.4           | 60.5                     | 26.1                    | 61.3                     | 25.7                    | 3.1                      |                           |
| 38 | G161               | 105.5           | 46.1                     |                         | 45.9                     |                         |                          |                           |

The secondary chemical shifts were calculated ( $\Delta\delta C\alpha - \Delta\delta C\beta$ ) for residues with C $\beta$  assignments. The <sup>13</sup>C chemical shift obtained from Shiftx2 predication was also shown for the corresponding sites. The respective 2<sup>nd</sup> structure region of the protein was labeled according to the crystal structure PDB:5YS3.
